# Supplementary material
Source: publisher figshare collection journal article supplement (https://diabetesjournals.figshare.com/articles/dataset/_/26981050)
Supplement: Supplementary file 1 [file 1]

## **Supplementary materials**

### ***Indirect calorimetry***

The mice were housed in individual chambers (150 cm<sup>2</sup> floor area, 8 cm in height). After at least 24 h of acclimatization, gas analysis was performed for 24 h at 23 °C using an open-circuit metabolic gas analysis system connected directly to a mass spectrometer (Arco2000; ArcoSystem, Chiba, Japan). Air was pumped into the chambers at a rate of 0.3 L/min. The expired air was directed to an O<sub>2</sub>/CO<sub>2</sub> analyzer for mass spectrometry. Motor activity was measured in each chamber using an infrared sensor (NS-AS01; Neuroscience Inc., Tokyo, Japan).

### ***Blood analysis***

Blood samples were collected by decapitation without anesthesia, and then centrifuged at 2,000 × g for 10 min at 4 °C. Serum triglyceride (TG), non-esterified fatty acid (NEFA), cholesterol, and insulin levels were measured using LabAssay Triglyceride, NEFA, and cholesterol kits (FUJIFILM Wako Pure Chemical Corporation, Osaka, Japan) and an Insulin ELISA kit (Morinaga Institute of Biological Science, Yokohama, Japan), respectively.

### ***Glucose tolerance and insulin tolerance tests***

For the oral glucose tolerance test, basal blood glucose levels were measured after fasting for 16 h, and glucose was orally administered to the mice (1 g/kg body weight). Subsequently, blood glucose concentrations were determined for 120 min. The insulin tolerance test was performed after a 2-hour fast. After measuring basal blood glucose levels, mice were intraperitoneally injected with insulin (0.75 U/kg body weight, Humulin-R; Eli Lilly, Indianapolis, IN, USA), and blood glucose levels were measured for 60 min.

### ***Quantitative real-time PCR***

Total RNA was extracted using phenol/guanidine-based reagents (Roche, Basel, Switzerland or Qiagen, Hilden, Germany) and then reverse-transcribed into cDNA using ReverTra Ace qRNA RT Master Mix (Toyobo, Osaka, Japan). The synthesized cDNA was diluted using EASY Dilution (Takara Bio Inc., Shiga, Japan). Gene expression levels were measured using specific primers (Supplementary Table 1) and THUNDERBIRD Next SYBR qPCR Mix (Toyobo). Expression levels of target genes were normalized to those of an internal control *Hprt*, *Rn18s* or *Rplp0*. The gene that was minimally affected by genotype and intervention was selected as the internal control.

**Supplementary Table 1. Primers used for real-time PCR**

| Gene                  |         | Sequence (5'-3')           |
|-----------------------|---------|----------------------------|
| <i>Ppargc1a Total</i> | Forward | TGATGTGAATGACTTGGATACAGACA |
|                       | Reverse | GCTCATTGTTGTACTGGTTGGATATG |
| <i>Ppargc1a-a</i>     | Forward | GGGACATGTGCAGCCAAGA        |
|                       | Reverse | AAGAGGCTGGTCCTCACCAA       |
| <i>Ppargc1a-b</i>     | Forward | GACATGGATGTTGGGATTGTCA     |
|                       | Reverse | ACCAACCAGAGCAGCACATTT      |
| <i>Ppargc1a-c</i>     | Forward | TGAGTAACCGGAGGCATTCTCT     |
|                       | Reverse | TGAGGACCGCTAGCAAGTTTG      |
| <i>Ucp1</i>           | Forward | TGCACCACACTCCTGGCCTCT      |
|                       | Reverse | GGCCGTCGGTCCTTCCTTGG       |
| <i>Ucp2</i>           | Forward | ATGGTTGGTTTCAAGGCCACA      |
|                       | Reverse | CGGTATCCAGAGGGAAAGTGAT     |
| <i>Ucp3</i>           | Forward | CTGCACCGCCAGATGAGTTT       |
|                       | Reverse | ATCATGGCTTGAAATCGGACC      |
| <i>Prdm16</i>         | Forward | TGCTGACGGATACAGAGGTGT      |
|                       | Reverse | CCACGCAGAACTTCTCGCTAC      |
| <i>Dio2</i>           | Forward | AATTATGCCTCGGAGAAGACCG     |
|                       | Reverse | GGCAGTTGCCTAGTGAAAGGT      |
| <i>Cidea</i>          | Forward | TGACATTCATGGGATTGCAGAC     |
|                       | Reverse | GGCCAGTTGTGATGACTAAGAC     |

|                        |         |                          |
|------------------------|---------|--------------------------|
| <i>Irf4</i>            | Forward | AAAGGCAAGTTCCGAGAAGGG    |
|                        | Reverse | CTCGACCAATTCCTCAAAGTCA   |
| <i>Cs</i>              | Forward | GGACAATTTTCCAACCAATCTGC  |
|                        | Reverse | TCGGTTCATTCCCTCTGCATA    |
| <i>Cyes</i>            | Forward | CCAAATCTCCACGGTCTGTTC    |
|                        | Reverse | ATCAGGGTATCCTCTCCCCAG    |
| <i>Uqcrc2</i>          | Forward | AAAGTTGCCCCGAAGGTTAAA    |
|                        | Reverse | GAGCATAGTTTTCCAGAGAAGCA  |
| <i>Cox4i1</i>          | Forward | GAGCCATTTCTACTTCGGTGTGC  |
|                        | Reverse | ACATCAGGCAAGGGGTAGTCAC   |
| <i>Atp5b</i>           | Forward | GGTTCATCCTGCCAGAGACTA    |
|                        | Reverse | AATCCCTCATCGAACTGGACG    |
| <i>Agt</i>             | Forward | TCTCCTTTACCACAACAAGAGCA  |
|                        | Reverse | CTTCTCATTACAGGGGAGGT     |
| <i>Retn</i>            | Forward | AAGAACCTTTTCATTTCCCCTCCT |
|                        | Reverse | GTCCAGCAATTTAAGCCAATGTT  |
| <i>Slc2a4 (Glut4)</i>  | Forward | GTGACTGGAACACTGGTCCTA    |
|                        | Reverse | CCAGCCACGTTGCATTGTAG     |
| <i>Hk2</i>             | Forward | TGATCGCCTGCTTATTCACGG    |
|                        | Reverse | AACCGCCTAGAAATCTCCAGA    |
| <i>Cd36</i>            | Forward | GGAGCCATCTTTGAGCCTTCA    |
|                        | Reverse | GAACCAAACCTGAGGAATGGATCT |
| <i>Cpt1a</i>           | Forward | CTCCGCCTGAGCCATGAAG      |
|                        | Reverse | CACCAGTGATGATGCCATTCT    |
| <i>Cpt1b</i>           | Forward | GCACACCAGGCAGTAGCTTT     |
|                        | Reverse | CAGGAGTTGATTCCAGACAGGTA  |
| <i>Acadm</i>           | Forward | AGGGTTTAGTTTTGAGTTGACGG  |
|                        | Reverse | CCCCGCTTTTGTTCATATTCCG   |
| <i>Atp2a1 (Serca1)</i> | Forward | TGTTTGTCTATTTCGGGGTG     |
|                        | Reverse | AATCCGCACAAGCAGGTCTTC    |
| <i>Atp2a2 (Serca2)</i> | Forward | GAGAACGCTCACACAAAGACC    |
|                        | Reverse | CAATTCGTTGGAGCCCCAT      |
| <i>Sln</i>             | Forward | TCCTCGTGAGGTCCTACCAA     |
|                        | Reverse | TAGAGCATTGGAAGCTCGGG     |
| <i>Fasn</i>            | Forward | GGAGGTGGTGATAGCCGGTAT    |
|                        | Reverse | TGGGTAATCCATAGAGCCCAG    |
| <i>Acaca (Acc1)</i>    | Forward | ATGGGCGGAATGGTCTCTTTC    |
|                        | Reverse | TGGGGACCTTGTCTTCATCAT    |
| <i>Acly</i>            | Forward | CAGCCAAGGCAATTCAGAGC     |
|                        | Reverse | CTCGACGTTTGATTAAGTGGTCT  |

|                         |         |                         |
|-------------------------|---------|-------------------------|
| <i>Scd1</i>             | Forward | TTCTTGCGATACACTCTGGTGC  |
|                         | Reverse | CGGGATTGAATGTTCTTGTCGT  |
| <i>Dgat1</i>            | Forward | GTGCCATCGTCTGCAAGATTC   |
|                         | Reverse | GCATCACCACACACCAATTCAG  |
| <i>Apob</i>             | Forward | AAGCACCTCCGAAAGTACGTG   |
|                         | Reverse | CTCCAGCTCTACCTTACAGTTGA |
| <i>Mttp</i>             | Forward | AGCCAGTGGGCATAGAAAATC   |
|                         | Reverse | GGTCACTTTACAATCCCCAGAG  |
| <i>Acox1</i>            | Forward | CCGCCACCTTCAATCCAGAG    |
|                         | Reverse | CAAGTTCTCGATTTCTCGACGG  |
| <i>Pparg</i>            | Forward | CTCCAAGAATACCAAAGTGCGA  |
|                         | Reverse | GCCTGATGCTTTATCCCCACA   |
| <i>Srebfl</i>           | Forward | GCAGCCACCATCTAGCCTG     |
|                         | Reverse | CAGCAGTGAGTCTGCCTTGAT   |
| <i>Mlxipl (Chrebpα)</i> | Forward | CGACACTCACCCACCTCTTC    |
|                         | Reverse | TTGTTTCAGCCGGATCTTGTC   |
| <i>Mlxipl (Chrebpβ)</i> | Forward | TCTGCAGATCGCGTGGAG      |
|                         | Reverse | CTTGTCCCGGCATAGCAAC     |
| <i>Nr1h3 (LXRα)</i>     | Forward | CTCAATGCCTGATGTTTCTCCT  |
|                         | Reverse | TCCAACCCTATCCCTAAAGCAA  |
| <i>Nr1h2 (LXRβ)</i>     | Forward | ATGTCTTCCCCCACAAGTTCT   |
|                         | Reverse | GACCACGATGTAGGCAGAGC    |
| <i>Pnpla2 (ATGL)</i>    | Forward | ATGTTCCCGAGGGAGACCAA    |
|                         | Reverse | GAGGCTCCGTAGATGTGAGTG   |
| <i>Lipe (HSL)</i>       | Forward | CCAGCCTGAGGGCTTACTG     |
|                         | Reverse | CTCCATTGACTGTGACATCTCG  |
| <i>Lpl</i>              | Forward | GGGAGTTTGGCTCCAGAGTTT   |
|                         | Reverse | TGTGTCTTCAGGGGTCTTAG    |
| <i>Rplp0</i>            | Forward | AGATTCGGGATATGCTGTTGGC  |
|                         | Reverse | TCGGGTCTTAGACCAGTGTC    |
| <i>Hprt</i>             | Forward | TCAGTCAACGGGGGACATAAA   |
|                         | Reverse | GGGGCTGTACTGCTTAACCAG   |
| <i>Rn18s</i>            | Forward | GTAACCCGTTGAACCCCAT     |
|                         | Reverse | CCATCCAATCGGTAGTAGCG    |

---

### Western blotting

Tissues were lysed in ice-cold lysis buffer supplemented with a protease and phosphatase inhibitor cocktail. After centrifugation, the protein concentration of the supernatant was determined using the bicinchoninic acid assay. Equal volumes of the lysates were subjected to SDS-PAGE. The separated proteins were transferred onto polyvinylidene difluoride membranes. After blocking, the target proteins were probed with specific primary (Supplementary Table 2) and secondary antibodies (1:3,000; Cell Signaling Technology, Danvers, MA, USA). Digital images were obtained using the chemiluminescence method. The signal intensities of the target proteins on the immunoblots were normalized using Coomassie Brilliant Blue staining.

**Supplementary Table 2. Primary antibodies used for western blotting**

| Name of antibody | Dilution | Company                   | Catalog Number |
|------------------|----------|---------------------------|----------------|
| UCP1             | 1:20000  | Cell Signaling Technology | 72298          |
| HSL              | 1:20000  | Cell Signaling Technology | 18381          |
| phospho-HSL S563 | 1:5000   | Cell Signaling Technology | 4139           |
| ATGL             | 1:5000   | Cell Signaling Technology | 2439           |
| FASN             | 1:5000   | Cell Signaling Technology | 3180           |
| ACC              | 1:5000   | Cell Signaling Technology | 3676           |
| ACLY             | 1:5000   | Cell Signaling Technology | 13390          |
| SCD1             | 1:5000   | Cell Signaling Technology | 2794           |
| CS               | 1:5000   | Cell Signaling Technology | 14309          |
| VDAC             | 1:5000   | Cell Signaling Technology | 4661           |
| SERCA1           | 1:5000   | Cell Signaling Technology | 12293          |
| SERCA2           | 1:5000   | Cell Signaling Technology | 9580           |

UCP1: uncoupling protein 1; HSL: hormone-sensitive lipase; ATGL: adipose triglyceride lipase; FASN: fatty acid synthase; ACC: acetyl-CoA carboxylase; ACLY: ATP-citrate lyase; SCD1: stearoyl-CoA desaturase 1; CS: citrate synthase; VDAC: voltage-dependent anion channel; SERCA: Sarcoplasmic/endoplasmic reticulum calcium ATPase.
