# Supplementary material
Source: publisher figshare collection journal article supplement (https://diabetesjournals.figshare.com/articles/dataset/_/26981050)

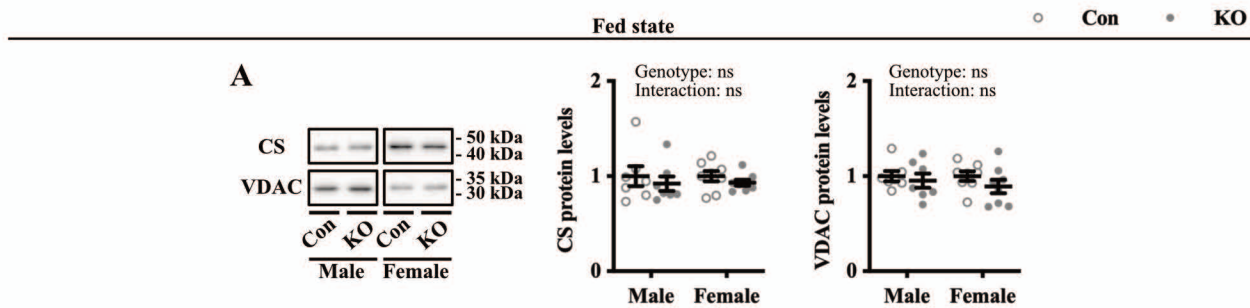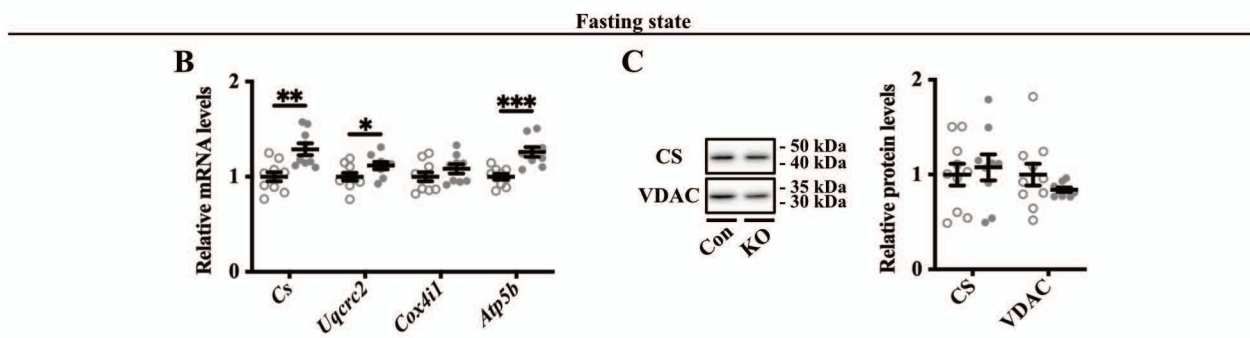

Supplement: Supplementary file 2 [file 1]

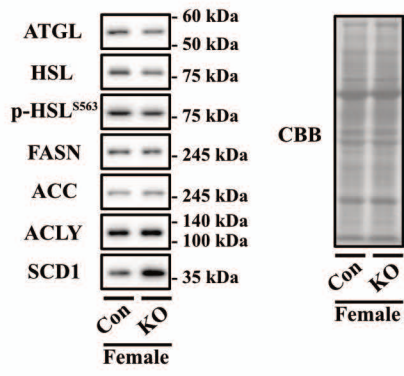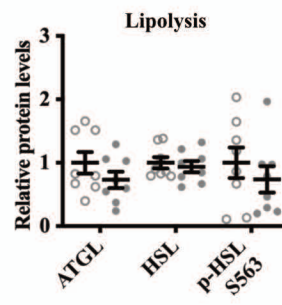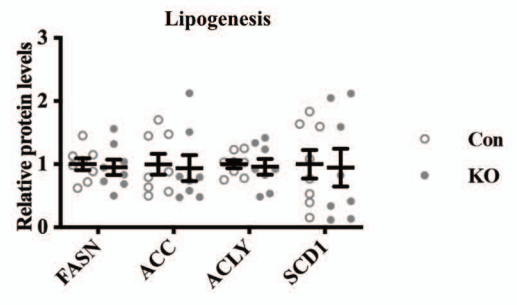

Supplement: Supplementary file 3 [file 1]
